# Supplementary material for: Development and applications of a near-infrared dye–benzylguanine conjugate to specifically label SNAP-tagged proteins
Source: Royal Society of Chemistry journal article supplement (doi:10.1039/c7ob01698k), 2017-01-01
Supplement: c7ob01698k1.pdf [file c7ob01698k1.pdf]

## Supporting information

# Development and Applications of a Near-infrared Dye-Benzylguanine Conjugate to Specifically Label SNAP Tagged Proteins

Xinbo Song, Chao Wang, Hui Bian, Mingyu Hu, Ning Li, and Yi Xiao\*

State Key Laboratory of Fine Chemicals, Dalian University of Technology, 2 Linggong Road,  
Dalian 116024, P.R. China;<sup>a</sup>

E-mail: [xiaoyi@dlut.edu.cn](mailto:xiaoyi@dlut.edu.cn)

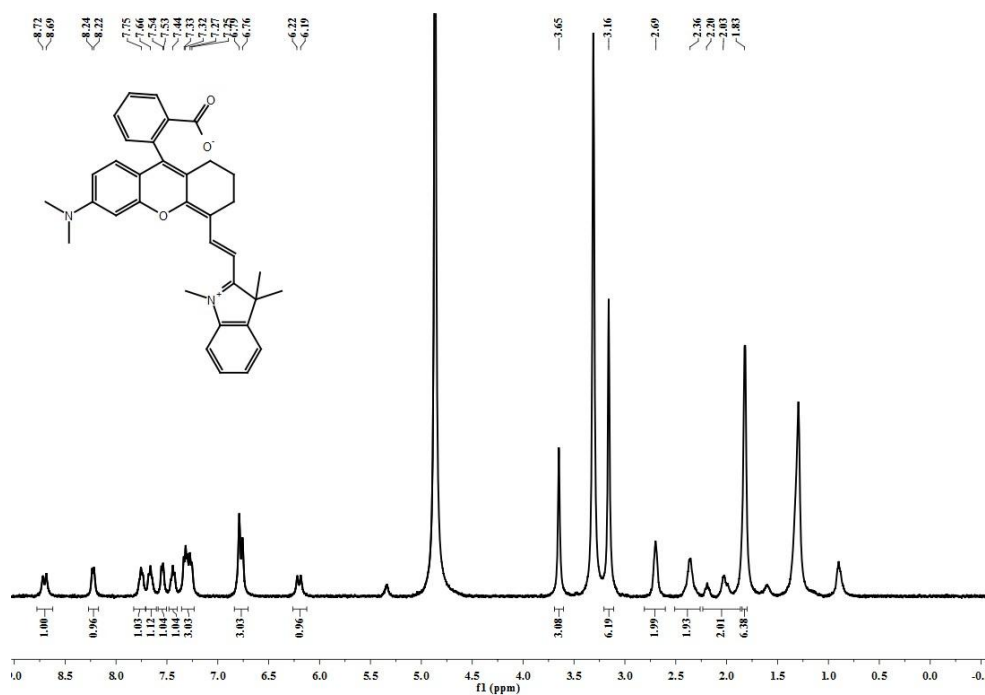

Figure S1. N-NIR <sup>1</sup>H NMR

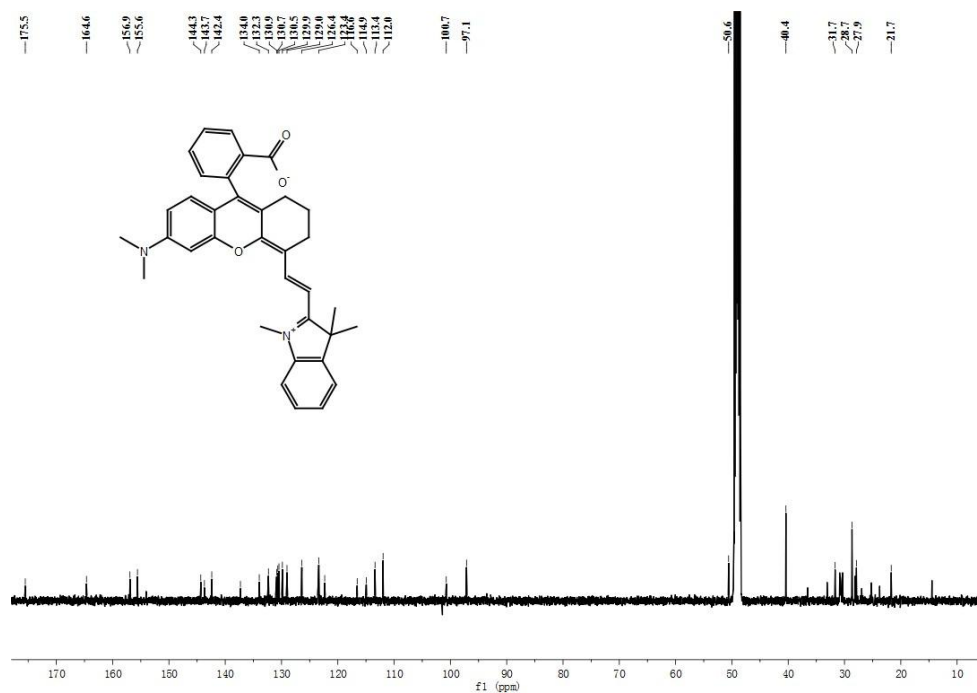

Figure S2. N-NIR  $^{13}\text{C-NMR}$

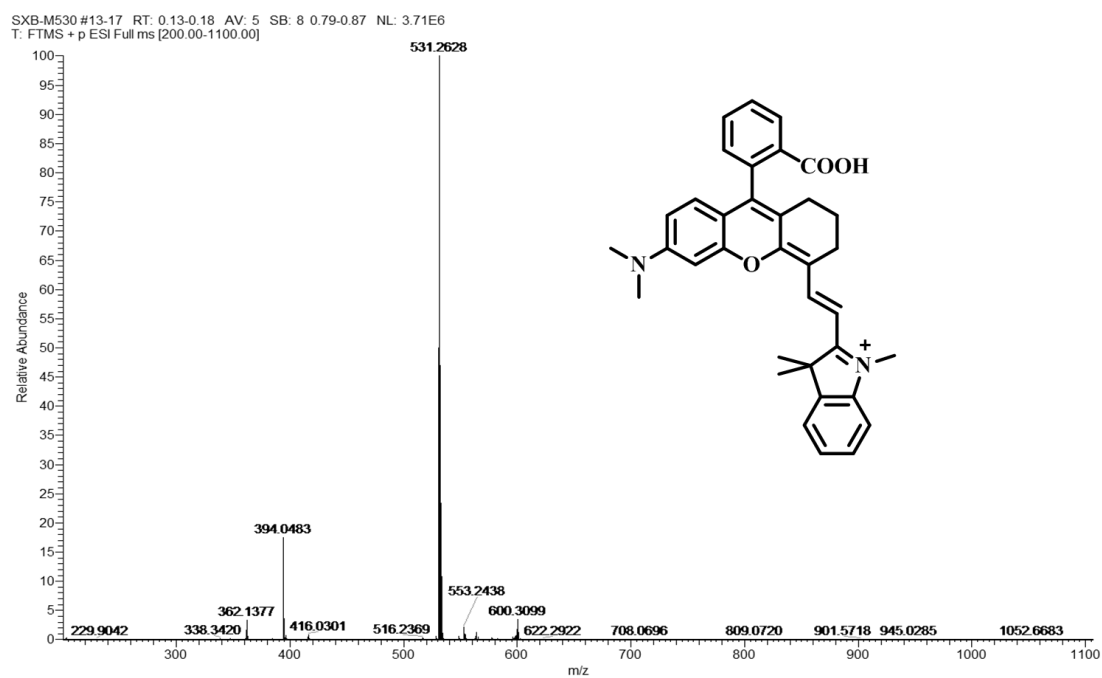

Figure S3. MS Spectrum N-NIR

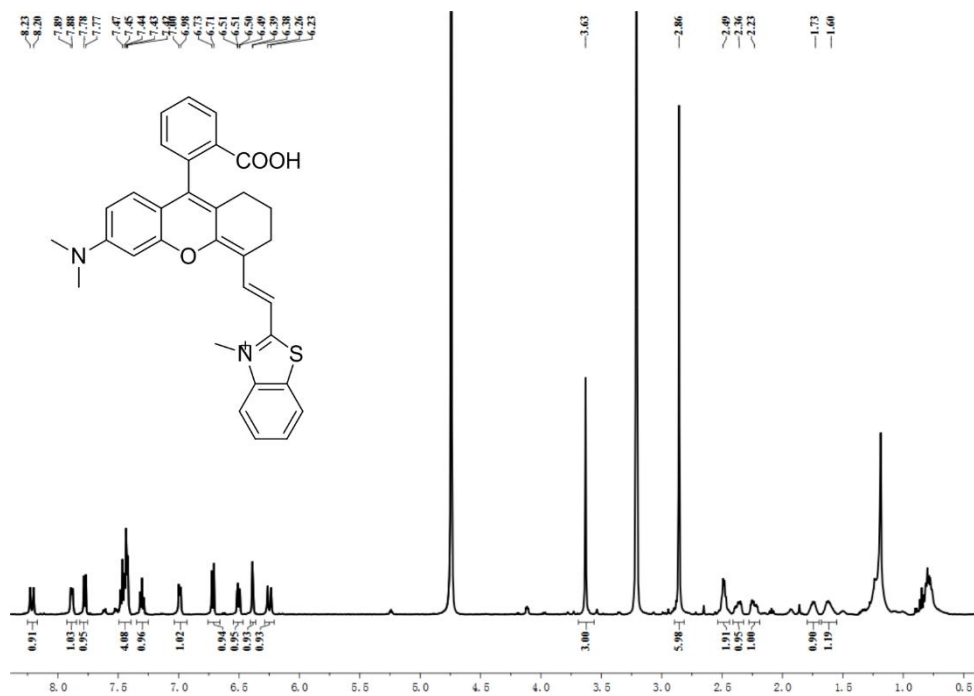

Figure S4. S-NIR  $^1\text{H NMR}$

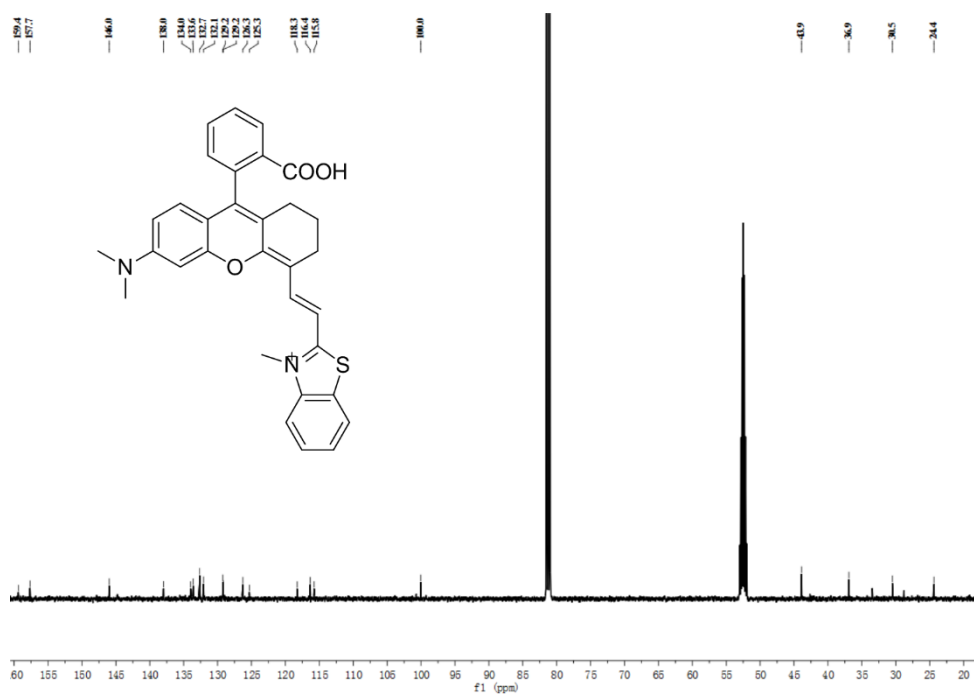

Figure S5. S-NIR  $^{13}\text{C NMR}$

SXB-2

16051314 3 (0.098)

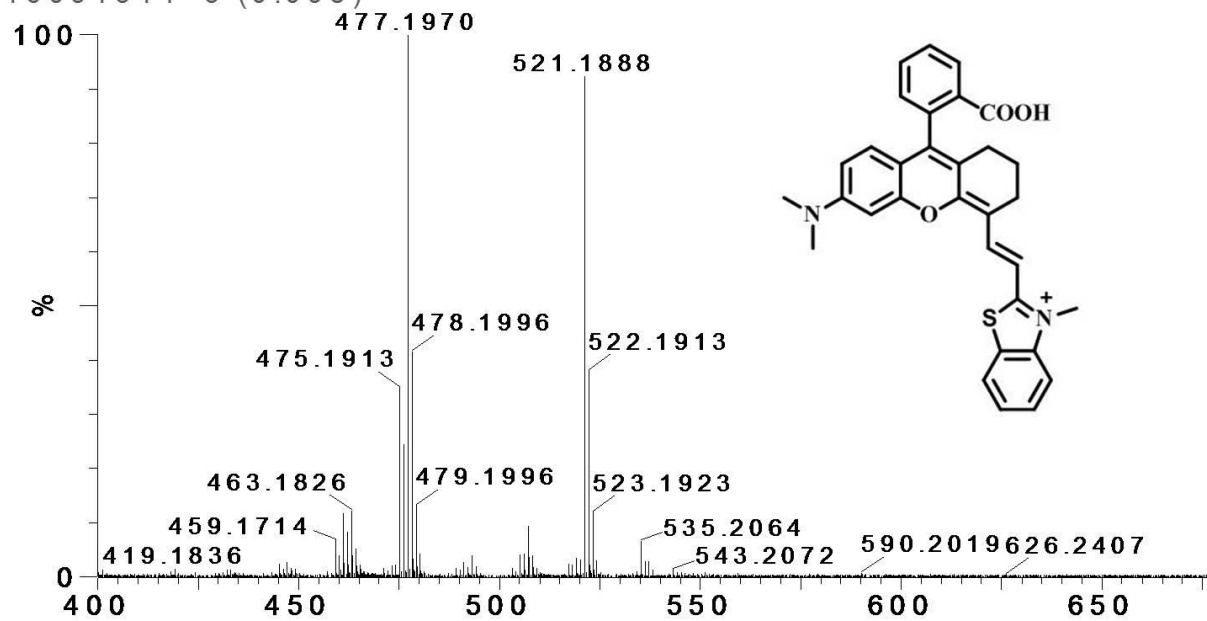

Figure S6. MS Spectrum S-NIR

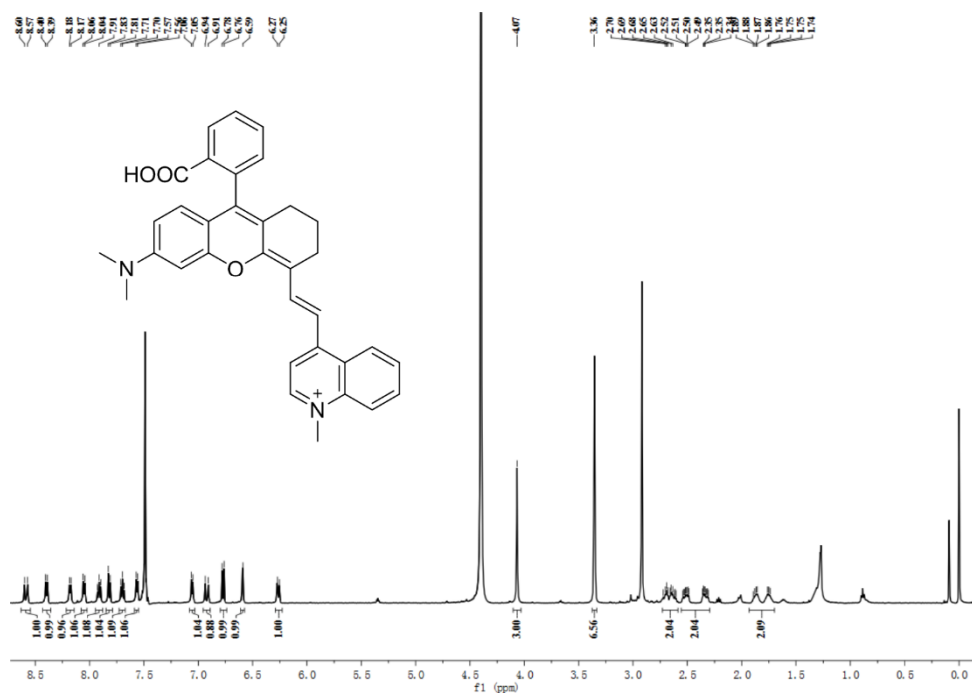

Figure S7. K-NIR  $^1\text{H}$  NMR

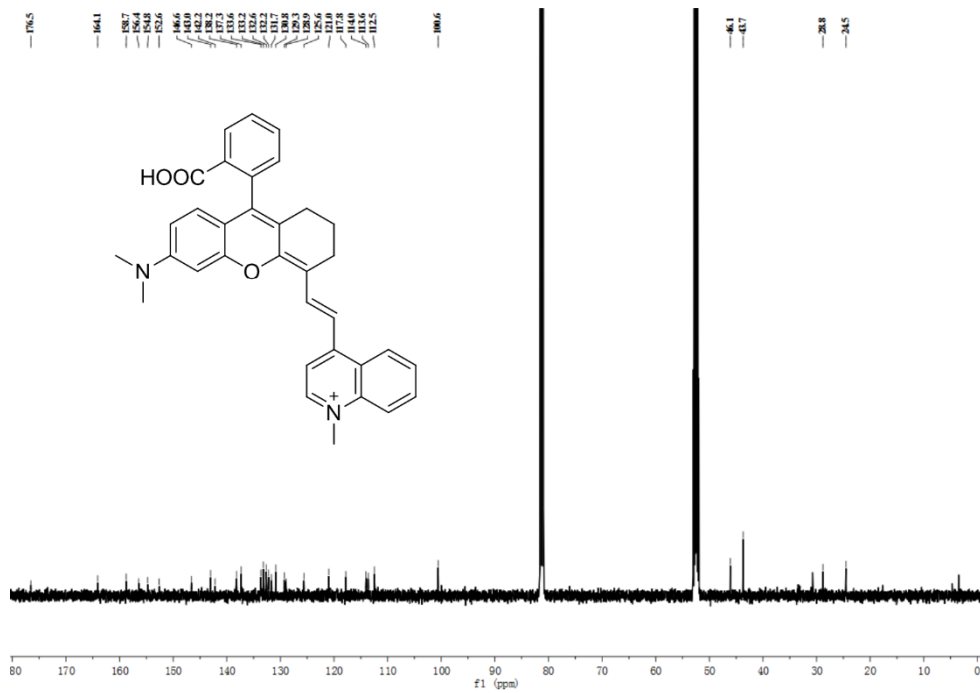

Figure S8. K-NIR  $^{13}\text{C}$ NMR

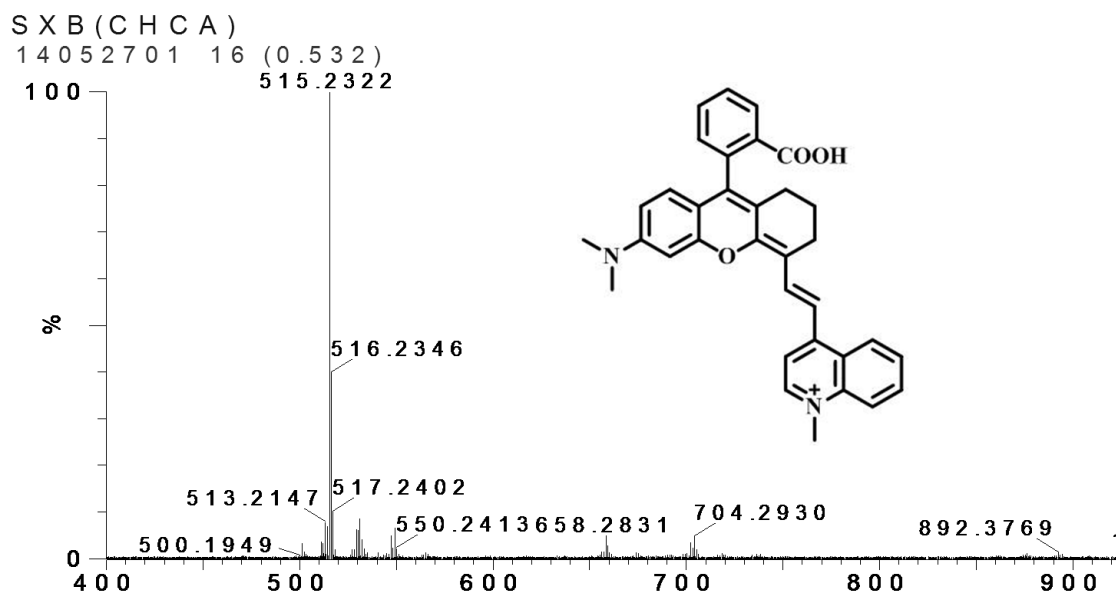

Figure S9. MS Spectrum K-NIR

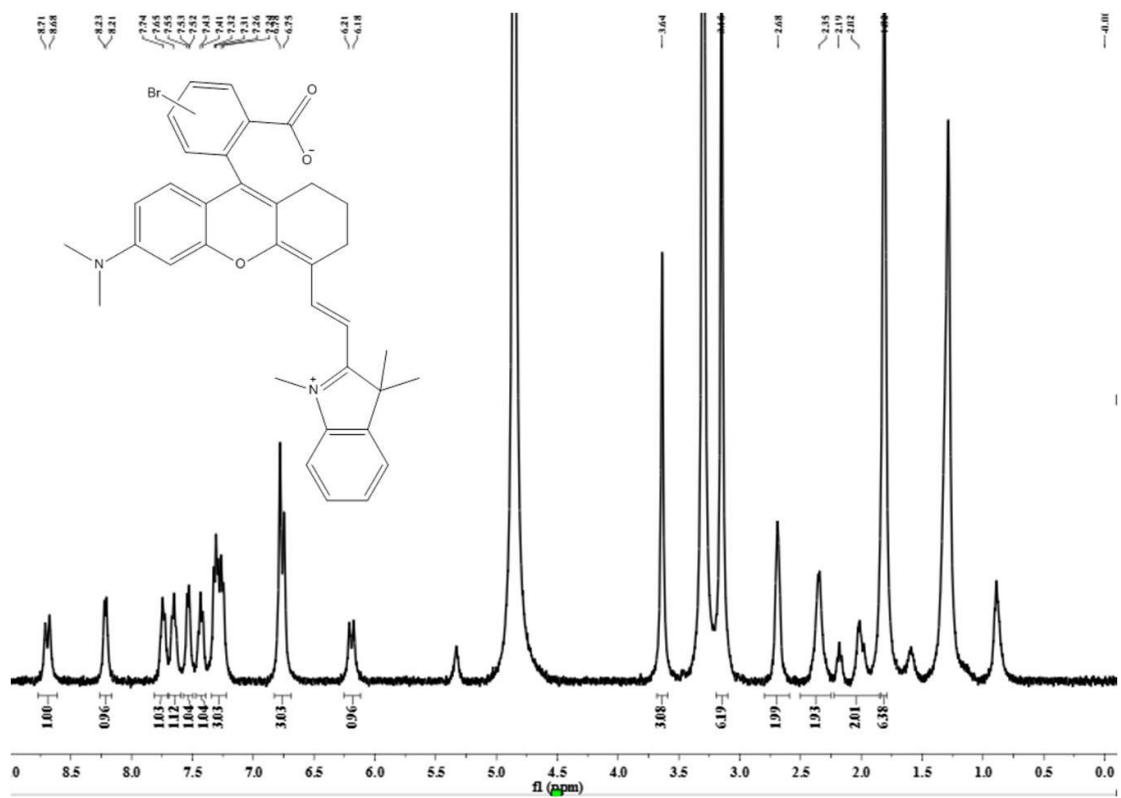

**Figure S10. Br-N-NIR**  $^1\text{H}$ NMR  
 SXB-2(CHCA)  
 14052308 44 (1.465)

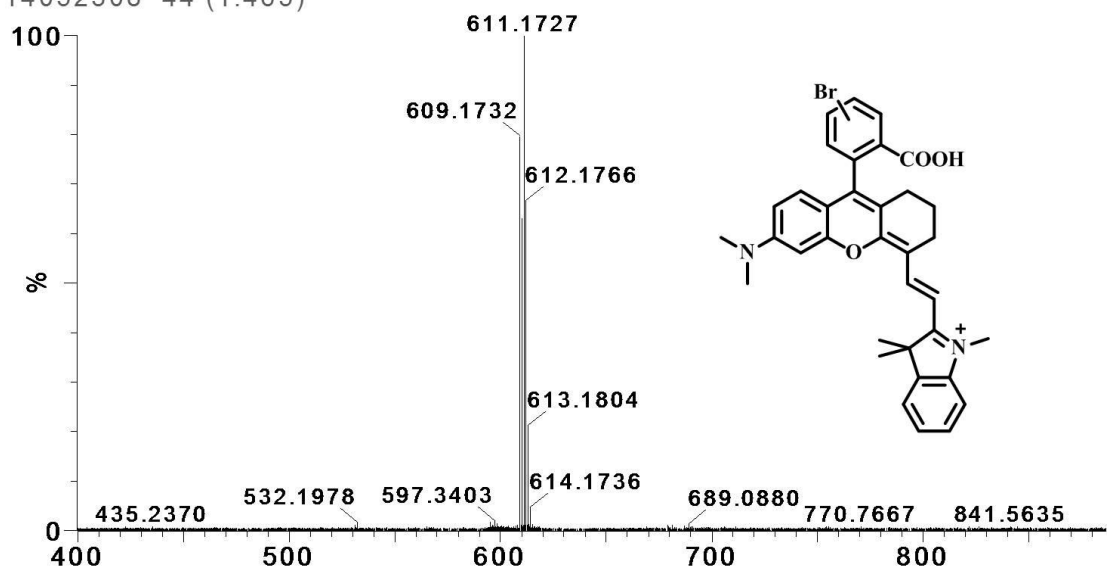

**Figure S11. MS Spectrum Br-N-NIR**

SXB-1

16051313 43 (1.432)

TOF LD+  
394

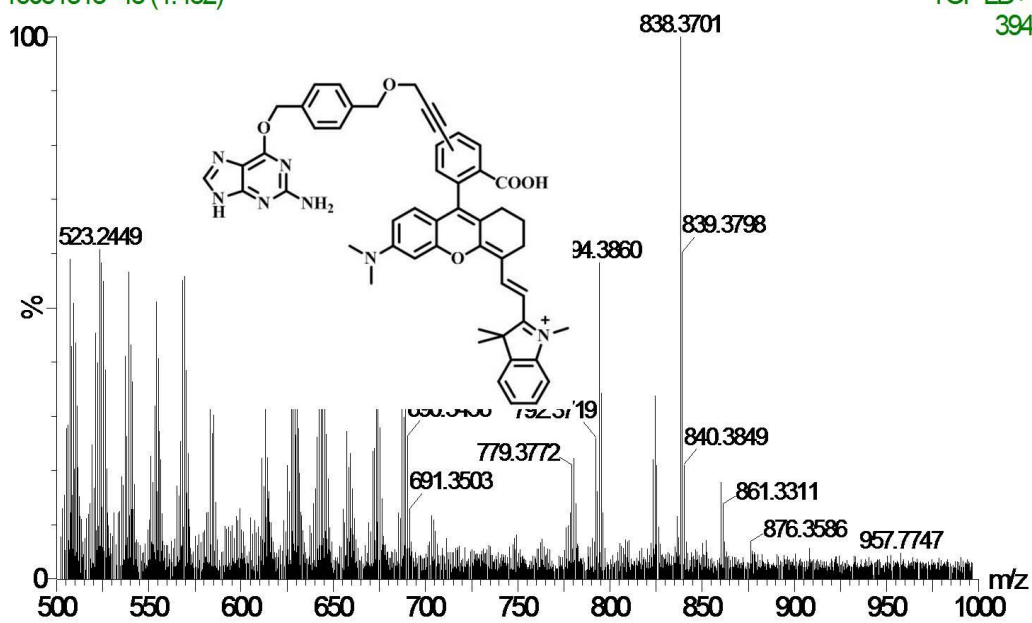

Figure S12. MS Spectrum PYBG-D

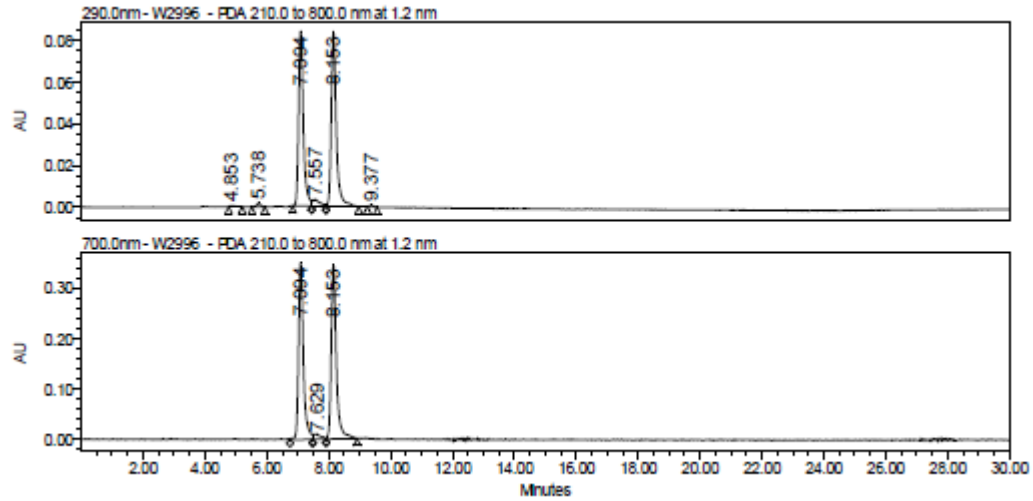

**Processed Channel Descr.: PDA 290.0 nm**

|   | Processed Channel Descr. | RT    | Area   | % Area | Height |
|---|--------------------------|-------|--------|--------|--------|
| 1 | PDA 290.0 nm             | 4.853 | 6748   | 0.35   | 539    |
| 2 | PDA 290.0 nm             | 5.738 | 15701  | 0.82   | 1774   |
| 3 | PDA 290.0 nm             | 7.094 | 885205 | 46.14  | 84229  |
| 4 | PDA 290.0 nm             | 7.557 | 53677  | 2.80   | 3255   |
| 5 | PDA 290.0 nm             | 8.153 | 950224 | 49.53  | 83903  |
| 6 | PDA 290.0 nm             | 9.377 | 6887   | 0.36   | 697    |

**Processed Channel Descr.: PDA 700.0 nm**

|   | Processed Channel Descr. | RT    | Area    | % Area | Height |
|---|--------------------------|-------|---------|--------|--------|
| 1 | PDA 700.0 nm             | 7.094 | 3791392 | 47.75  | 352380 |
| 2 | PDA 700.0 nm             | 7.629 | 177288  | 2.23   | 10181  |
| 3 | PDA 700.0 nm             | 8.153 | 3971125 | 50.02  | 347144 |

**Figure 13.** HPLC spectrum **PYBG-D**



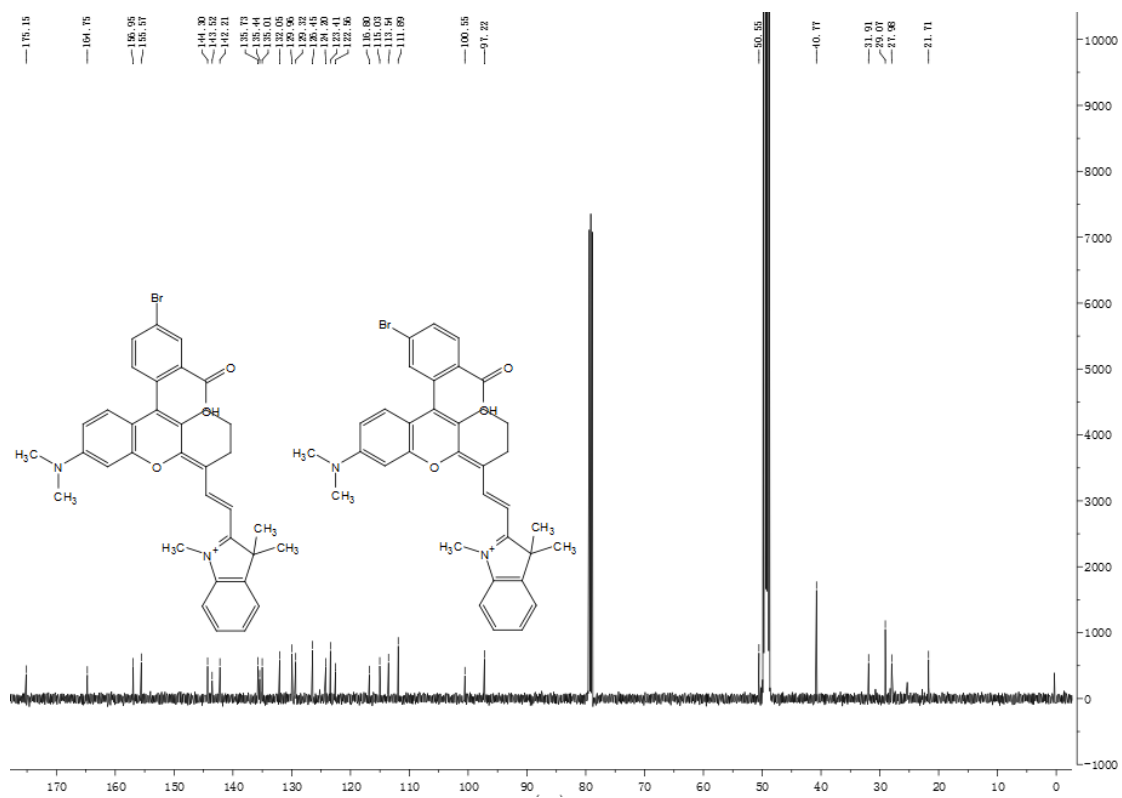

Figure 14. Br-N-NIR  $^{13}\text{C}$  NMR

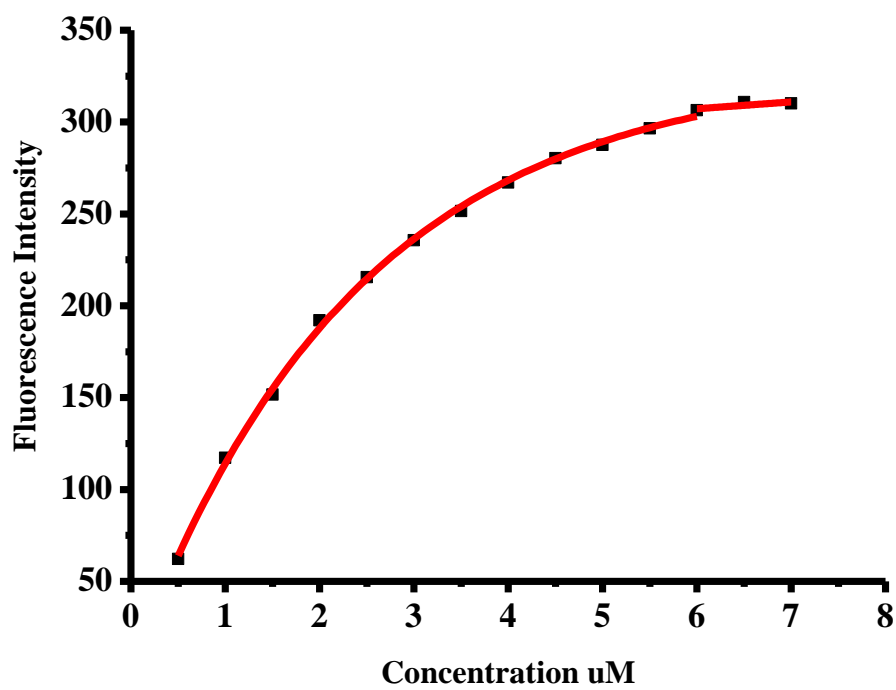

Figure 15. The water solubility of N-NIR

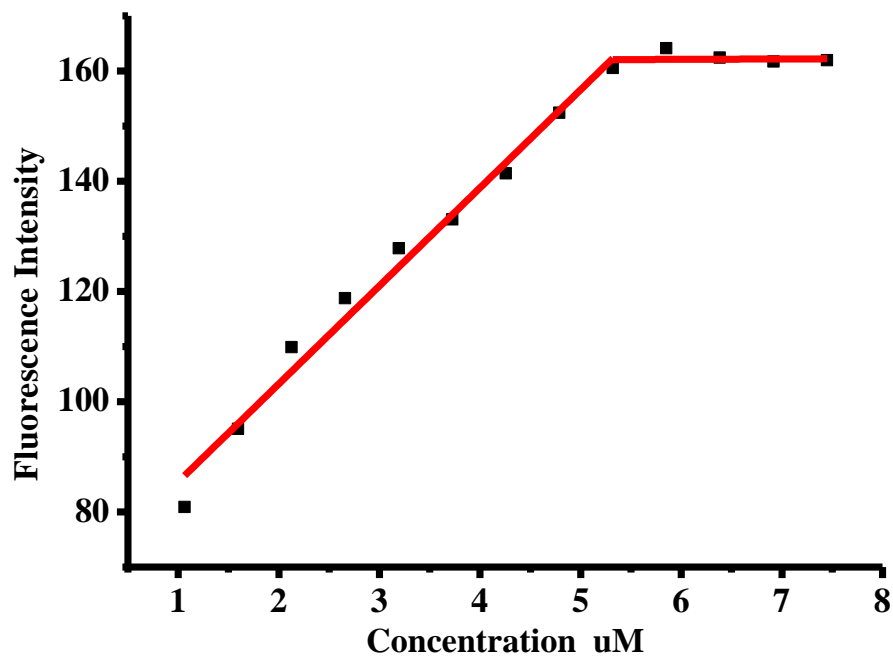

Figure 16. The water solubility of S-NIR

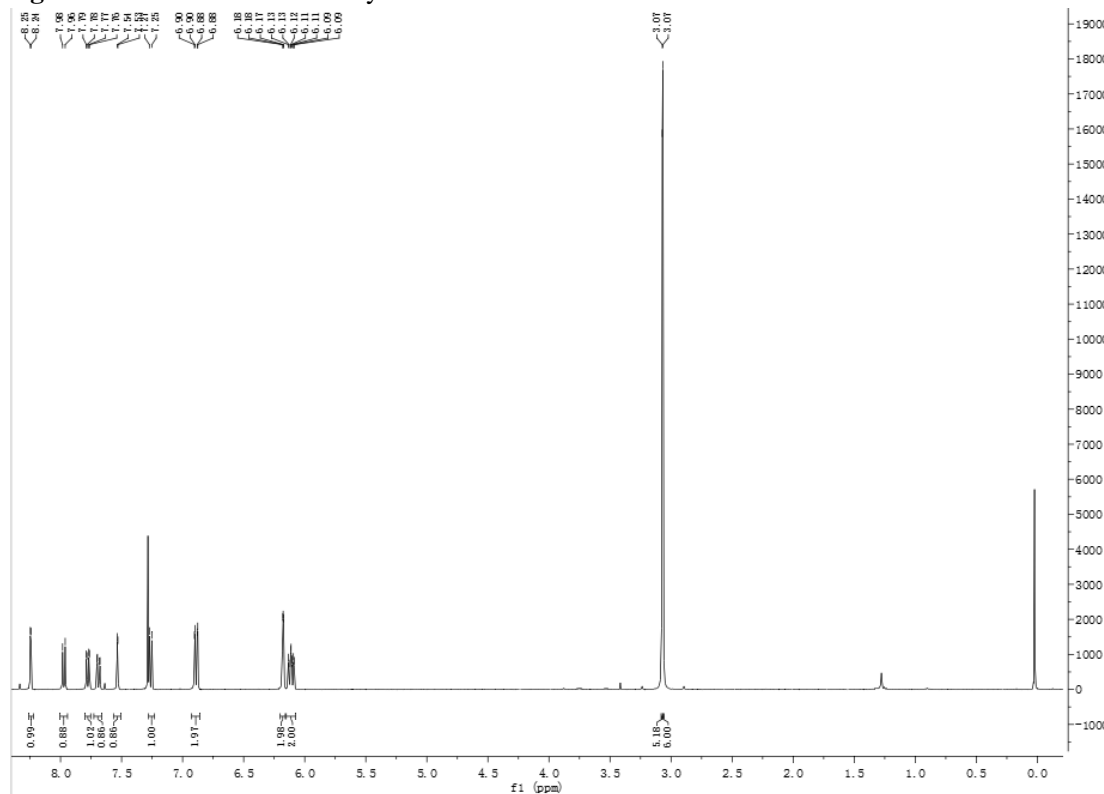

Figure 17.  $^1\text{H}$ NMR

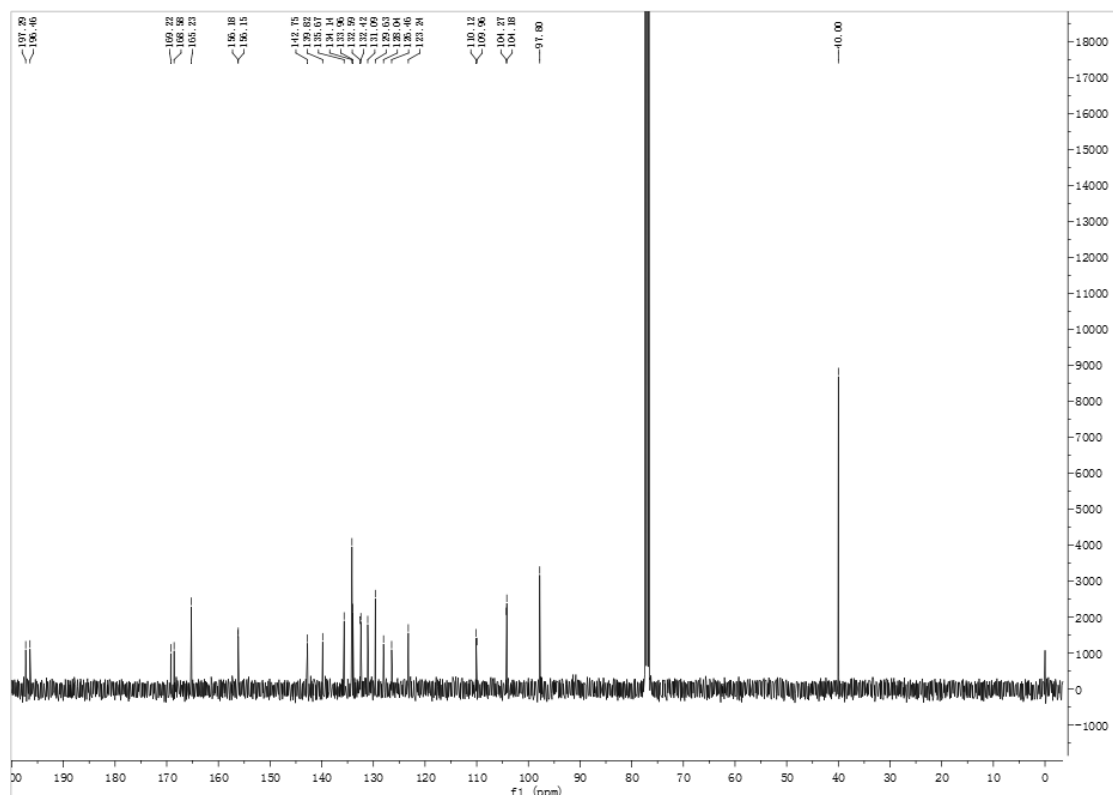

Figure 18.  $r$   $^{13}\text{C}$ NMR

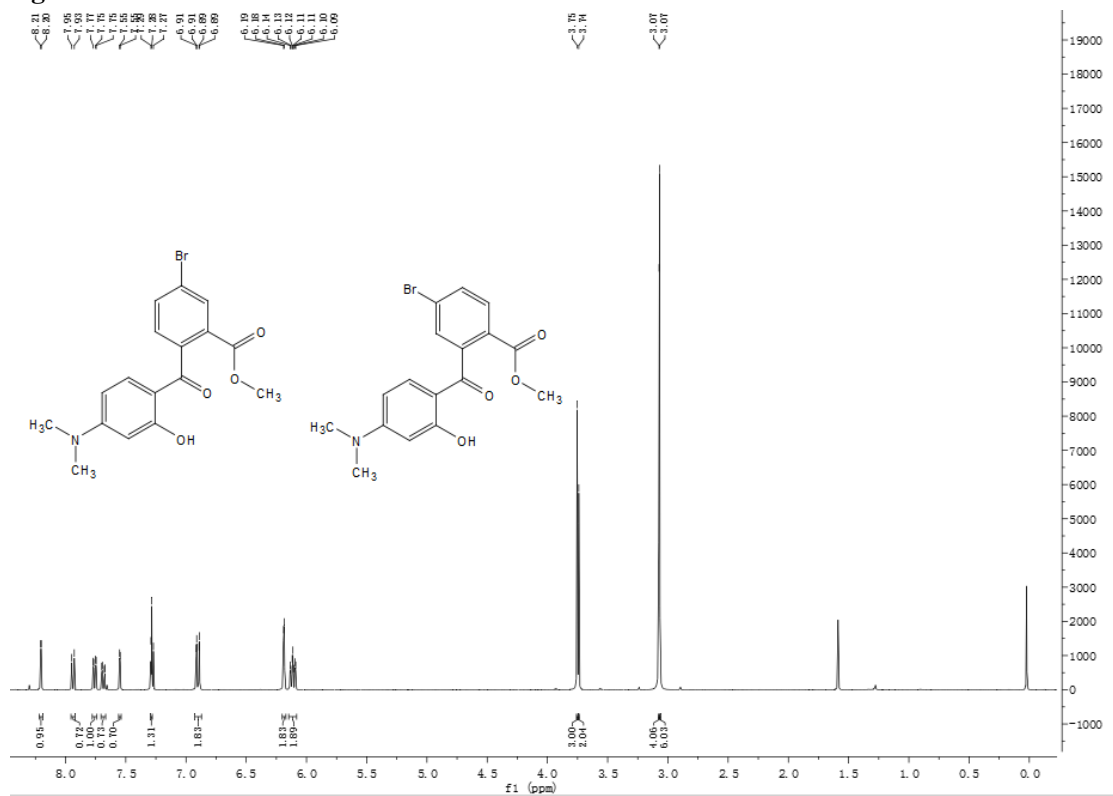

Figure 19. the compounds before  $r$   $^1\text{H}$ NMR

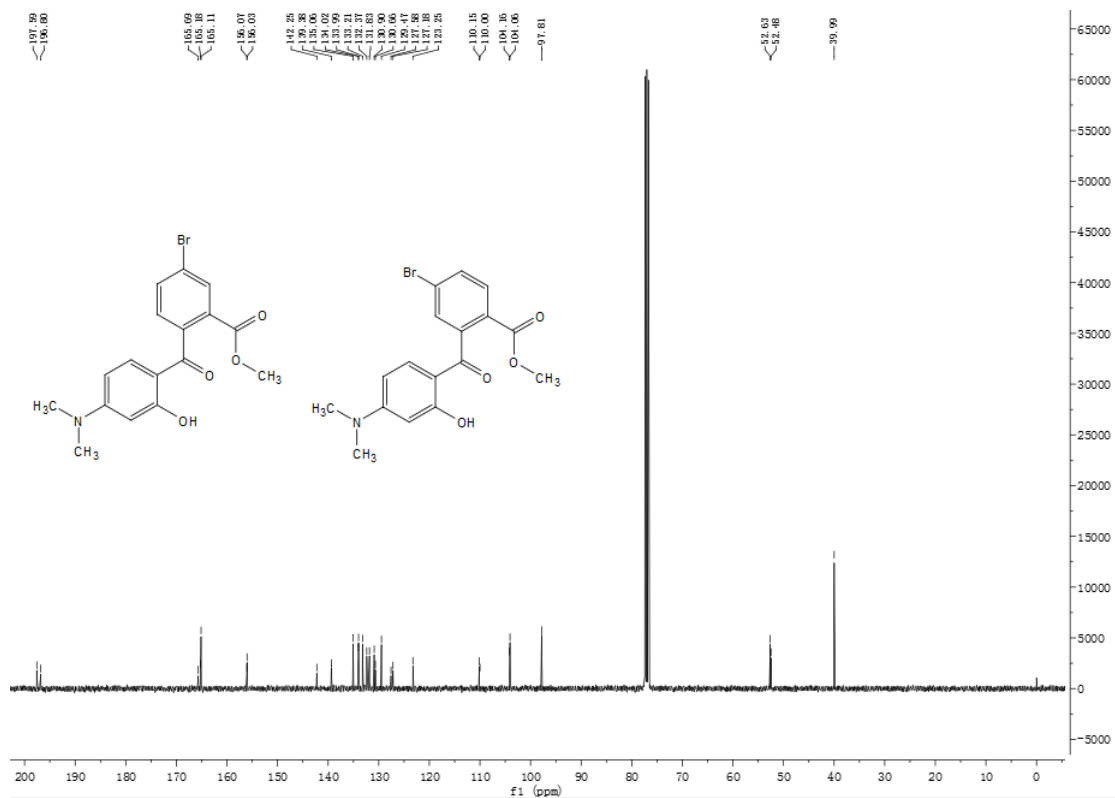

Figure 20. the compounds before r  $^{13}\text{C}$  NMR

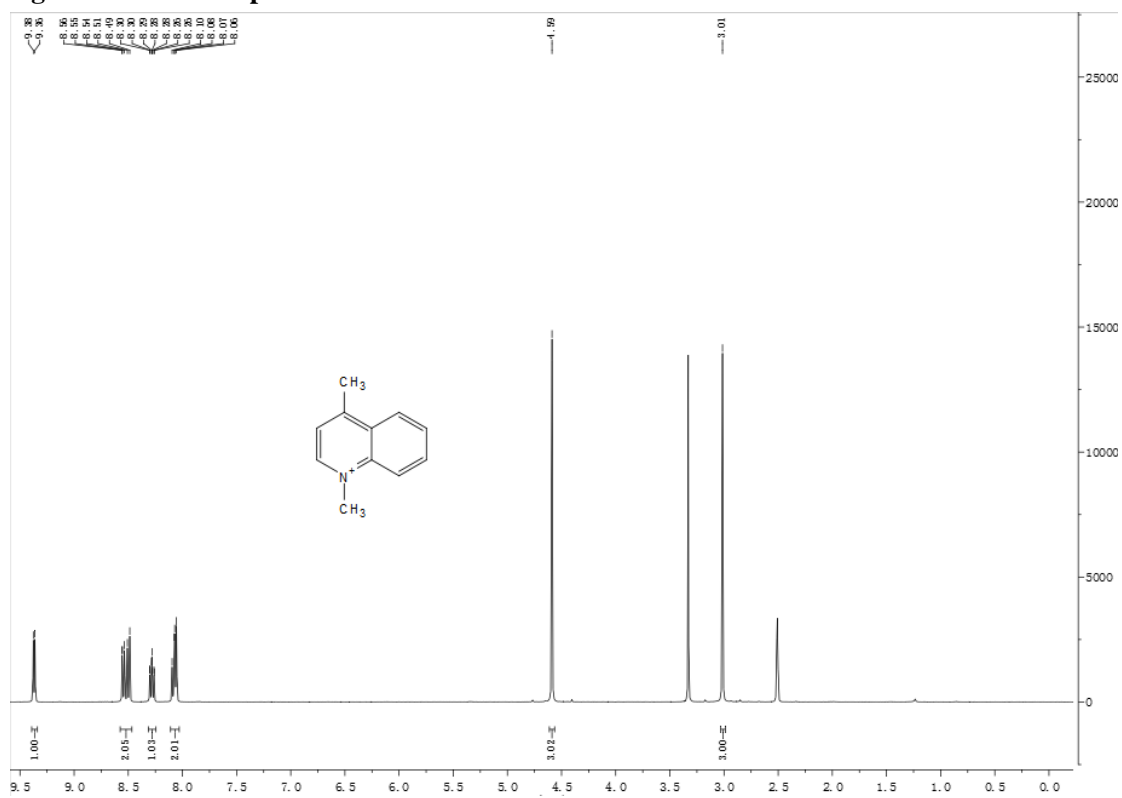

Figure 21. h  $^1\text{H}$ NMR in DMSO

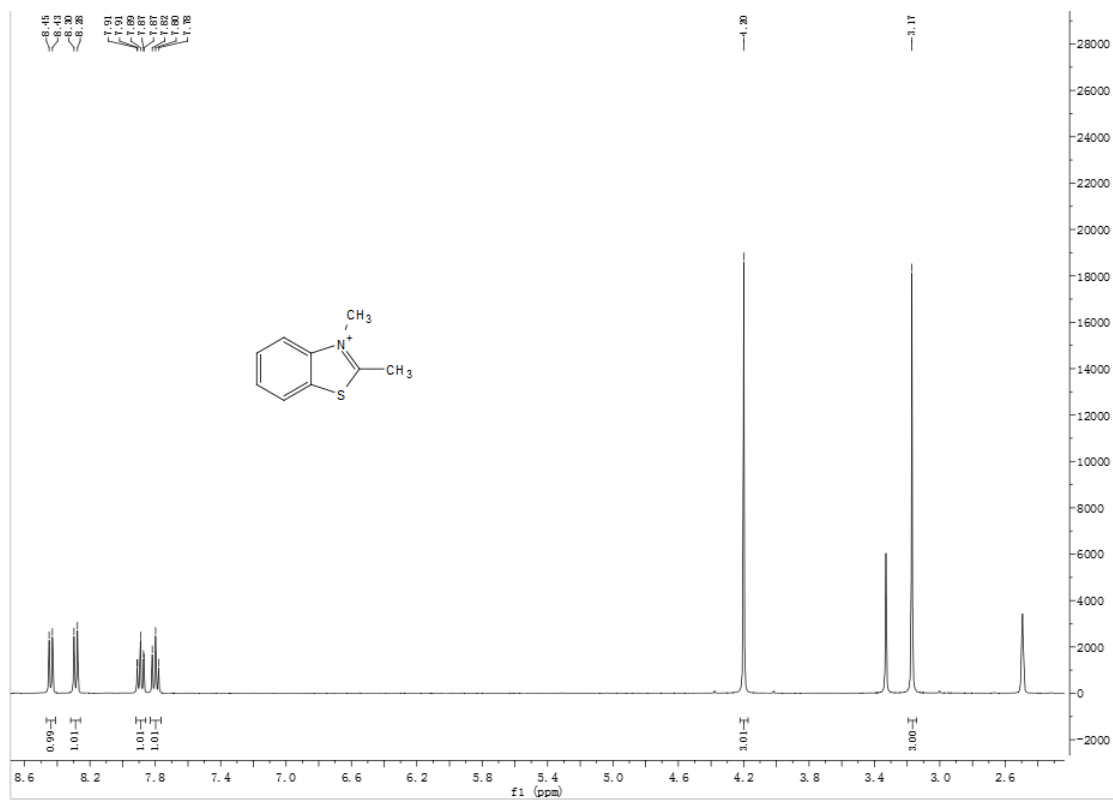

Figure 22. f  $^1\text{H}$ NMR in DMSO

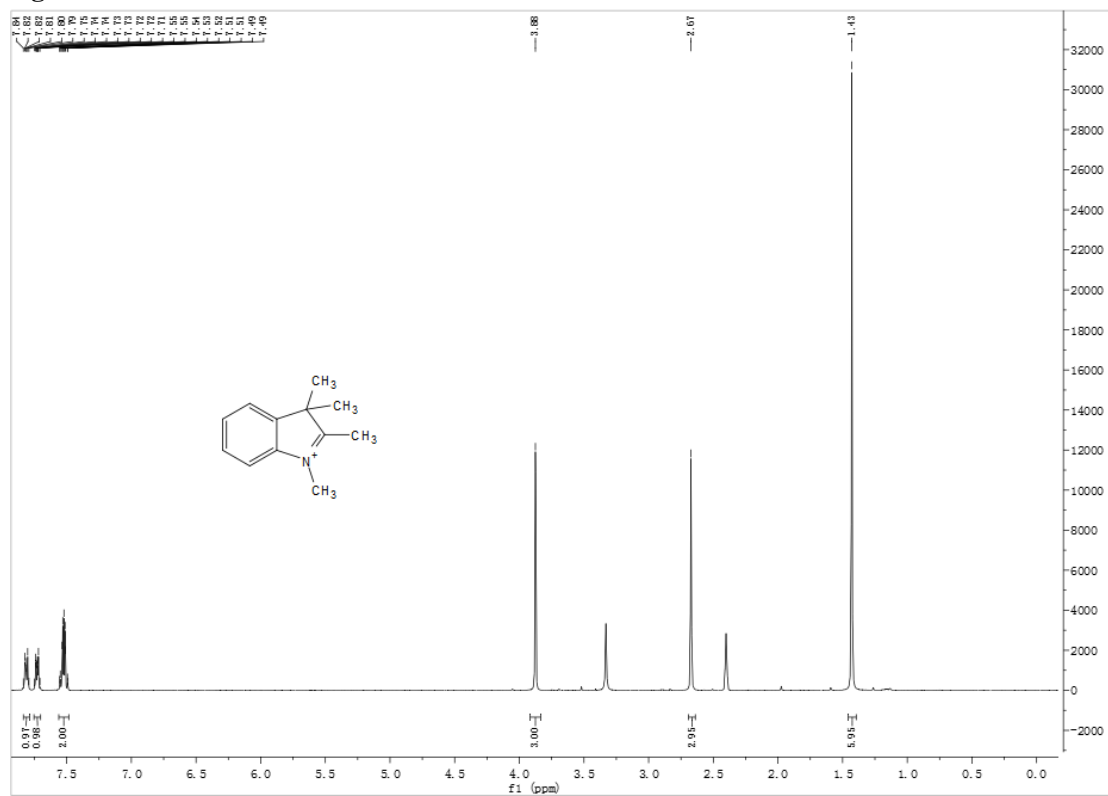

Figure 23. b  $^1\text{H}$ NMR in DMSO

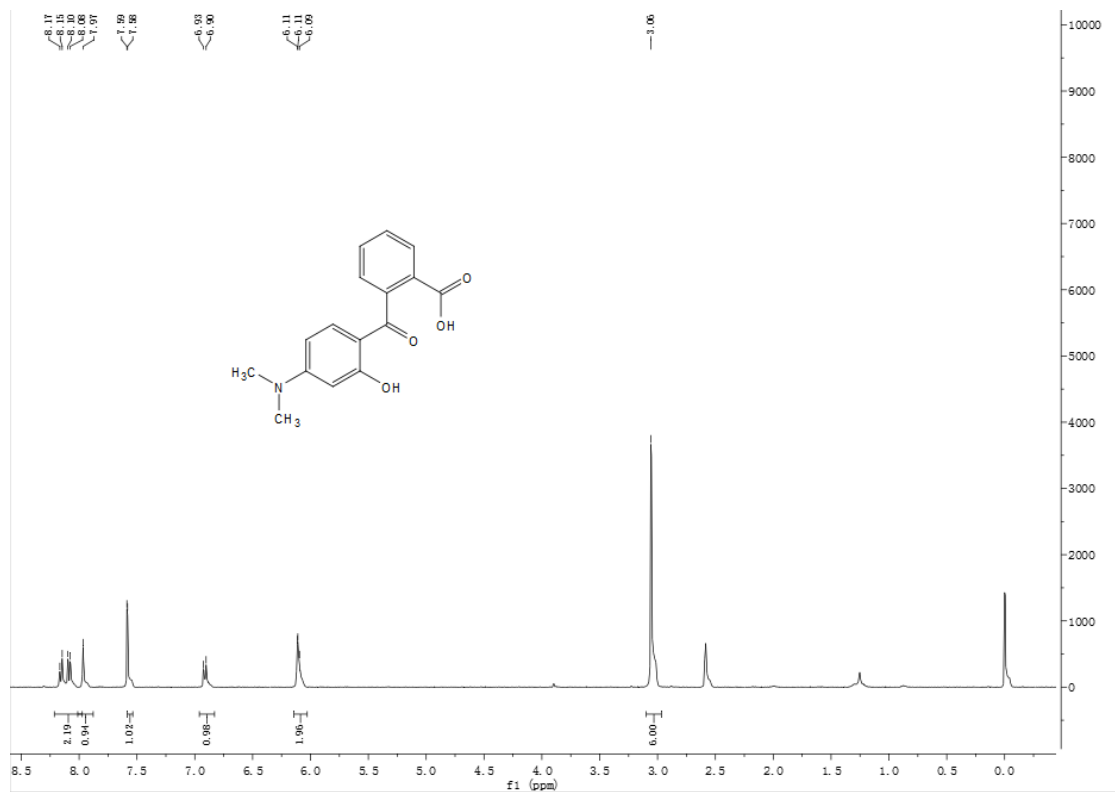

Figure 24. j  $^1\text{H}$ NMR in DMSO

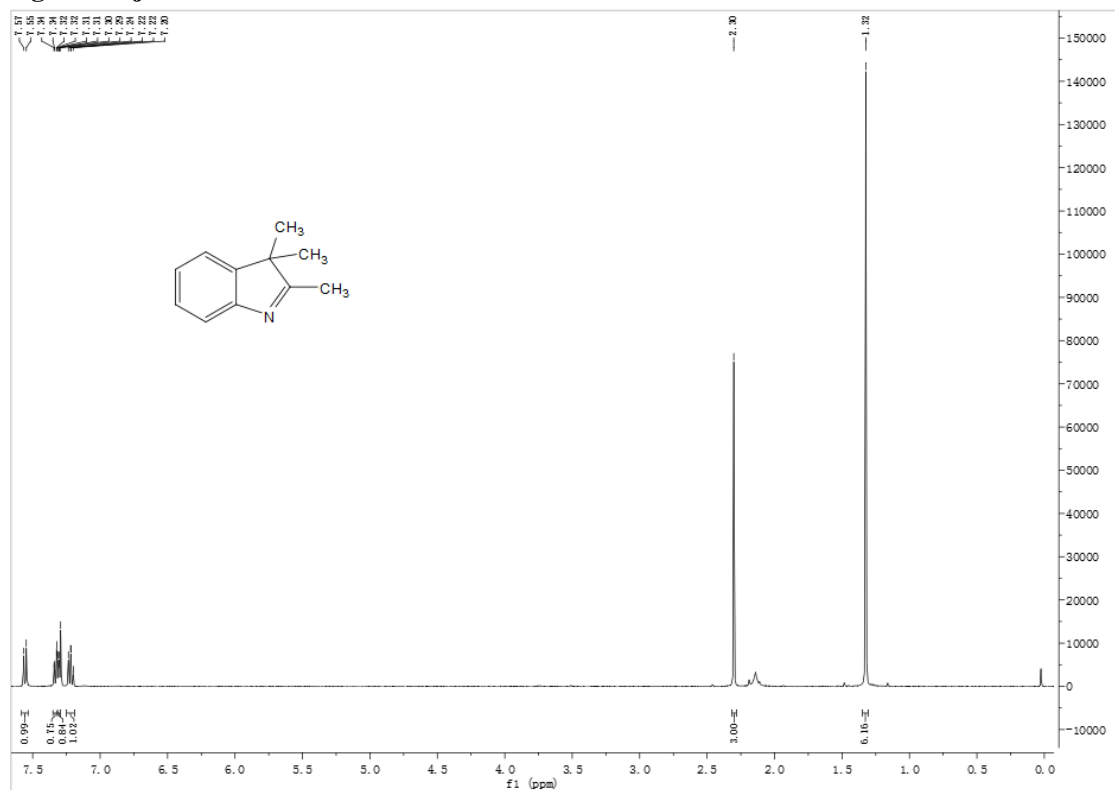

Figure 25.a  $^1\text{H}$ NMR in  $\text{CDCl}_3$

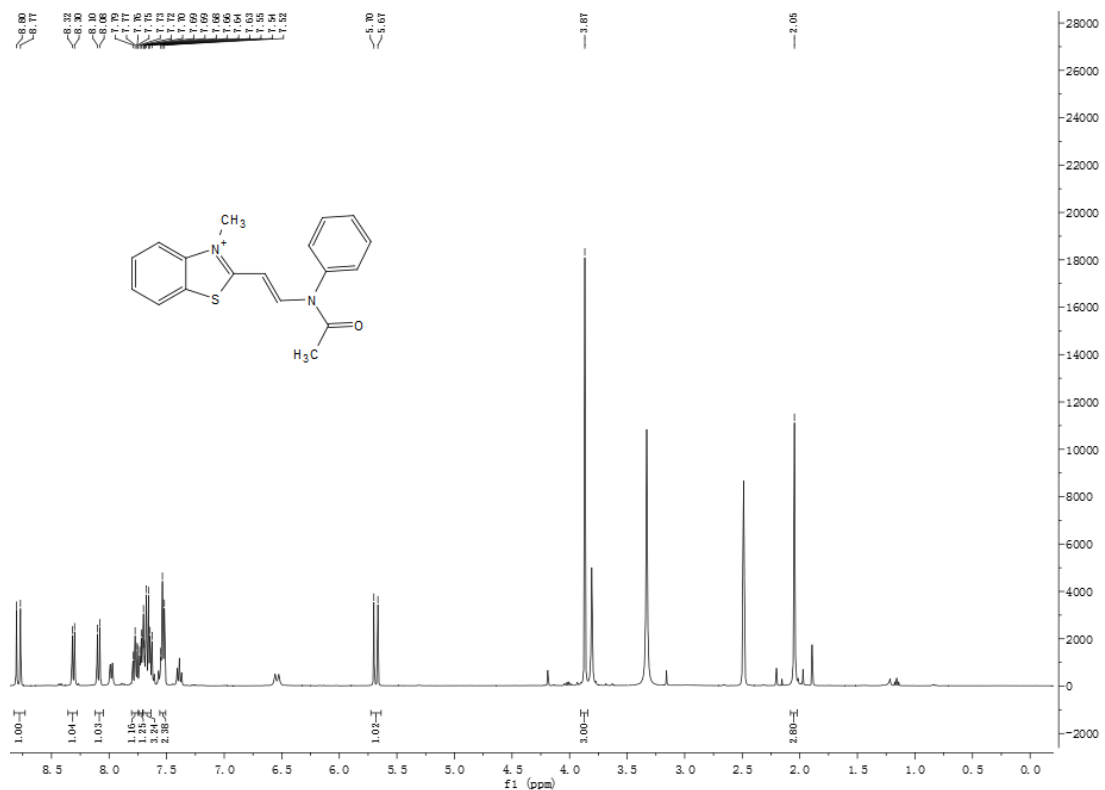

Figure 26.g <sup>1</sup>HNMR in DMSO

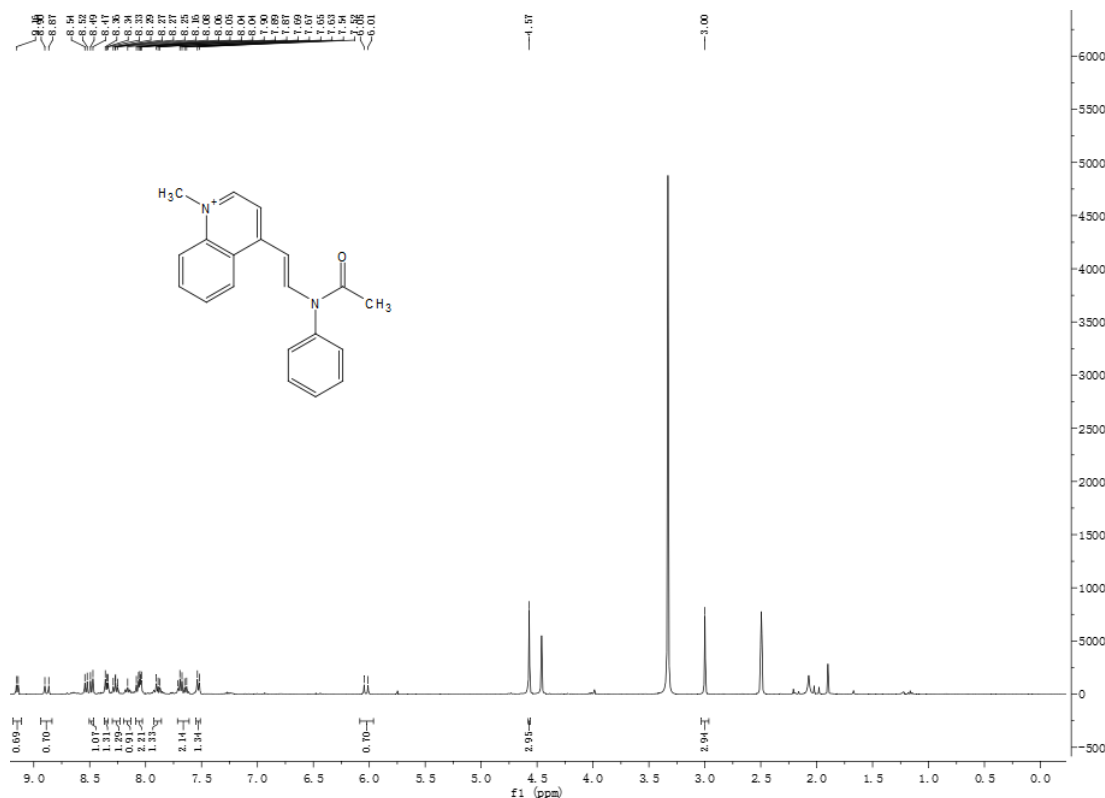

Figure 27.i <sup>1</sup>HNMR in DMSO

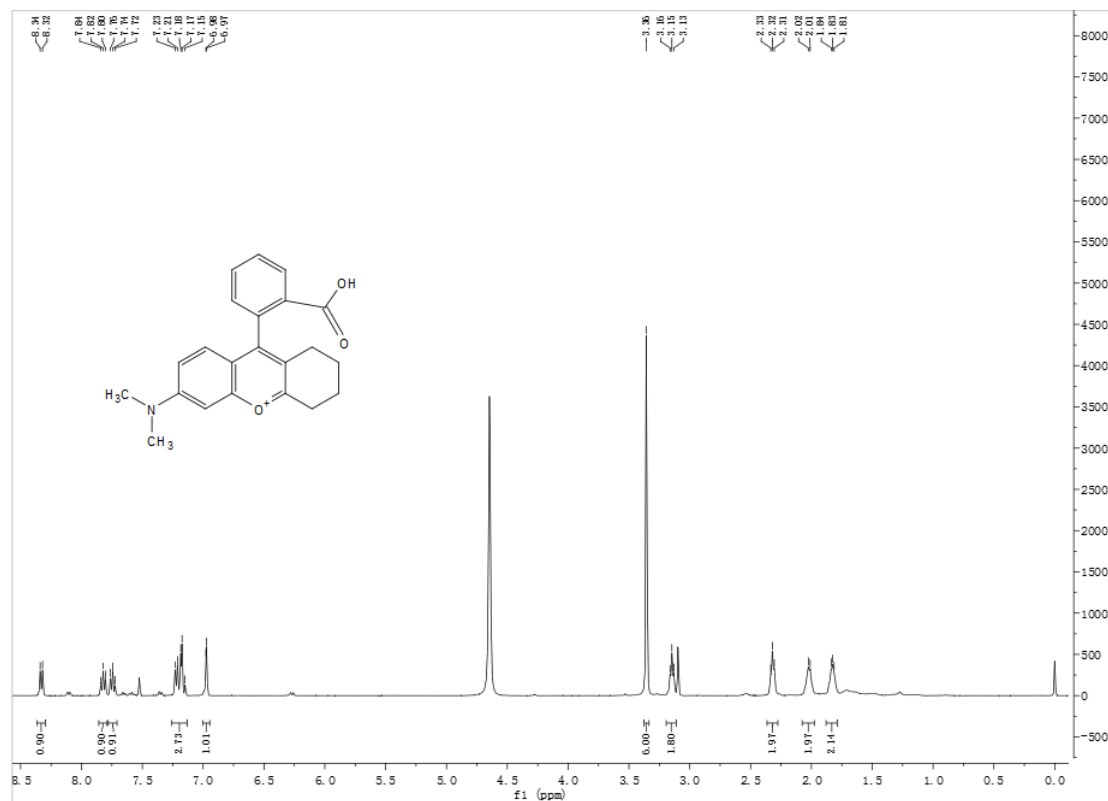

Figure 28.k <sup>1</sup>H NMR

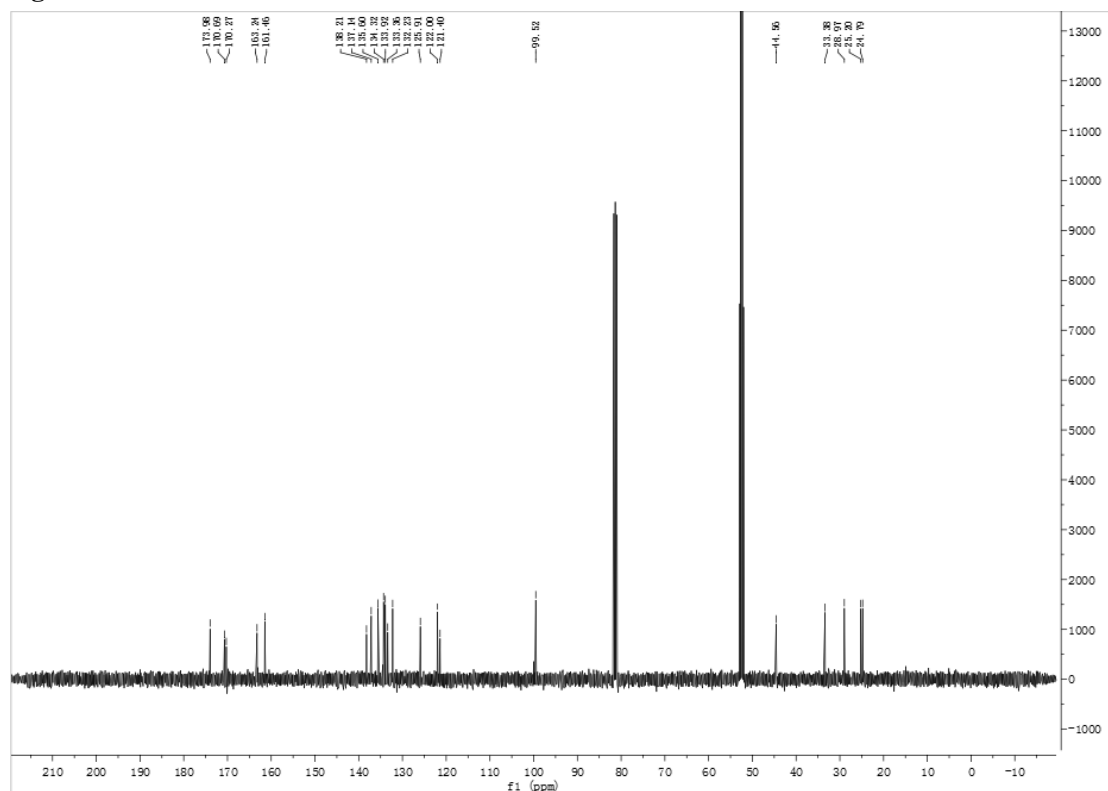

Figure 29.k <sup>13</sup>C NMR



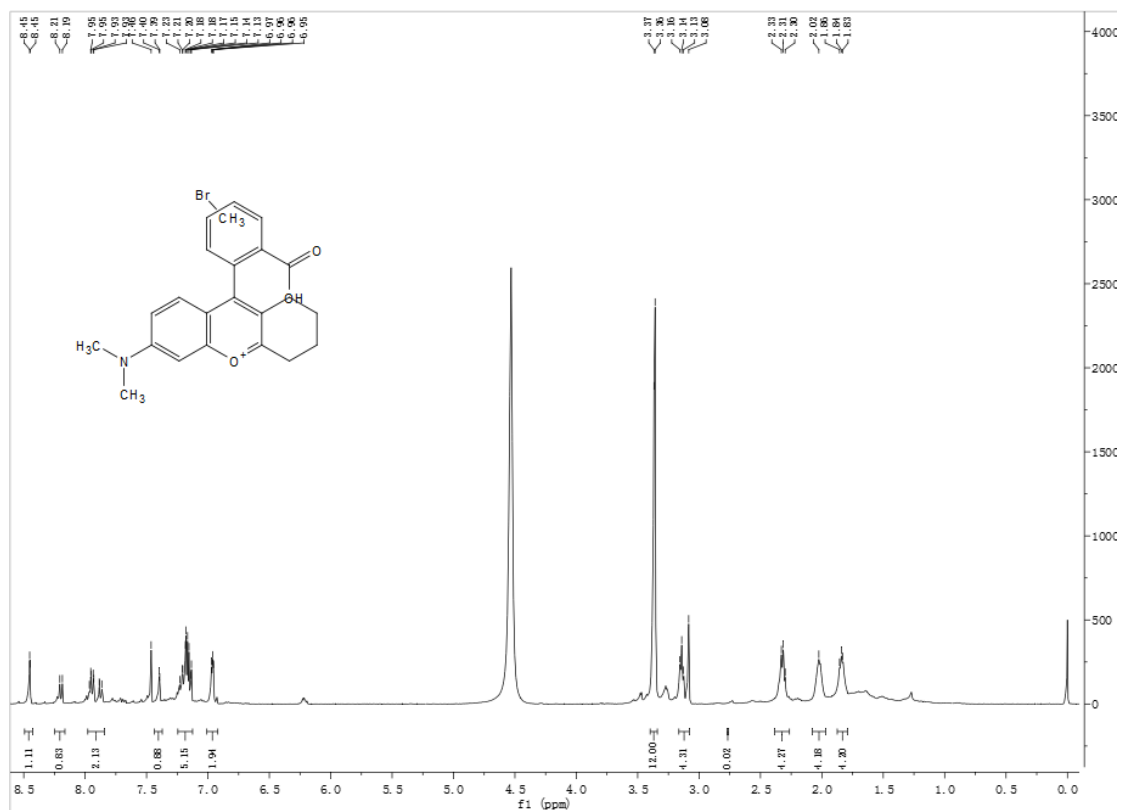

**Figure 30.s**  $^1\text{H}$  NMR

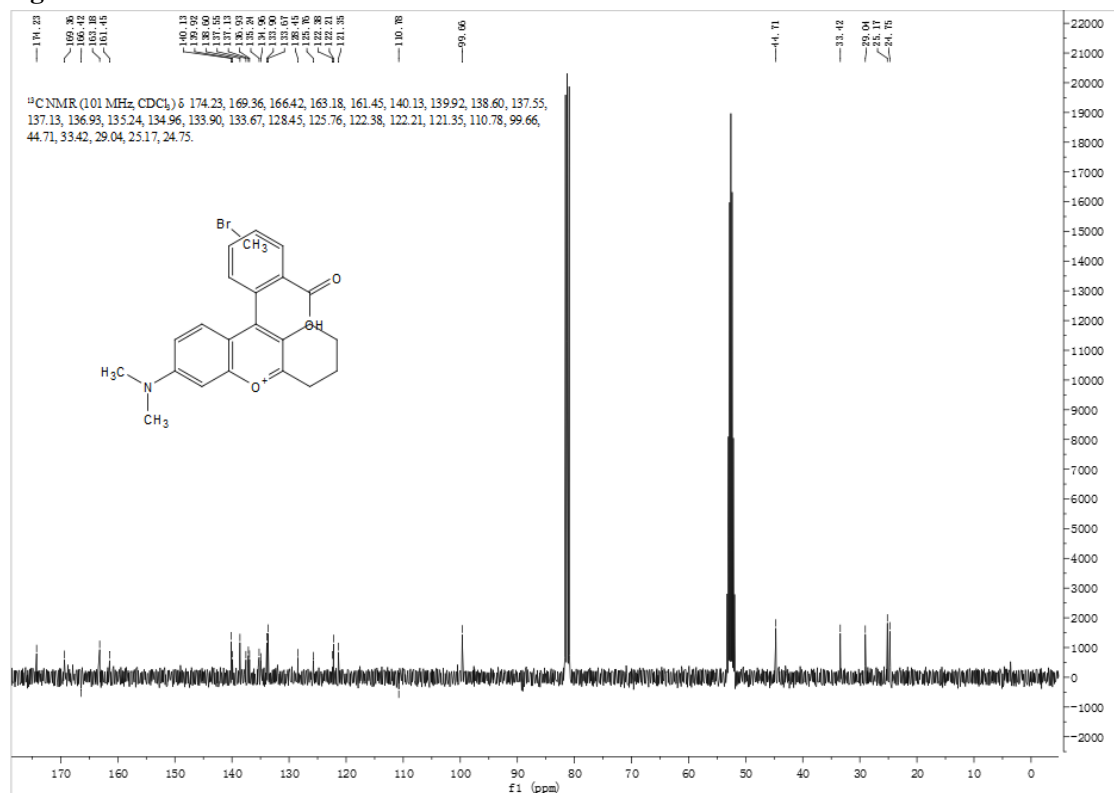

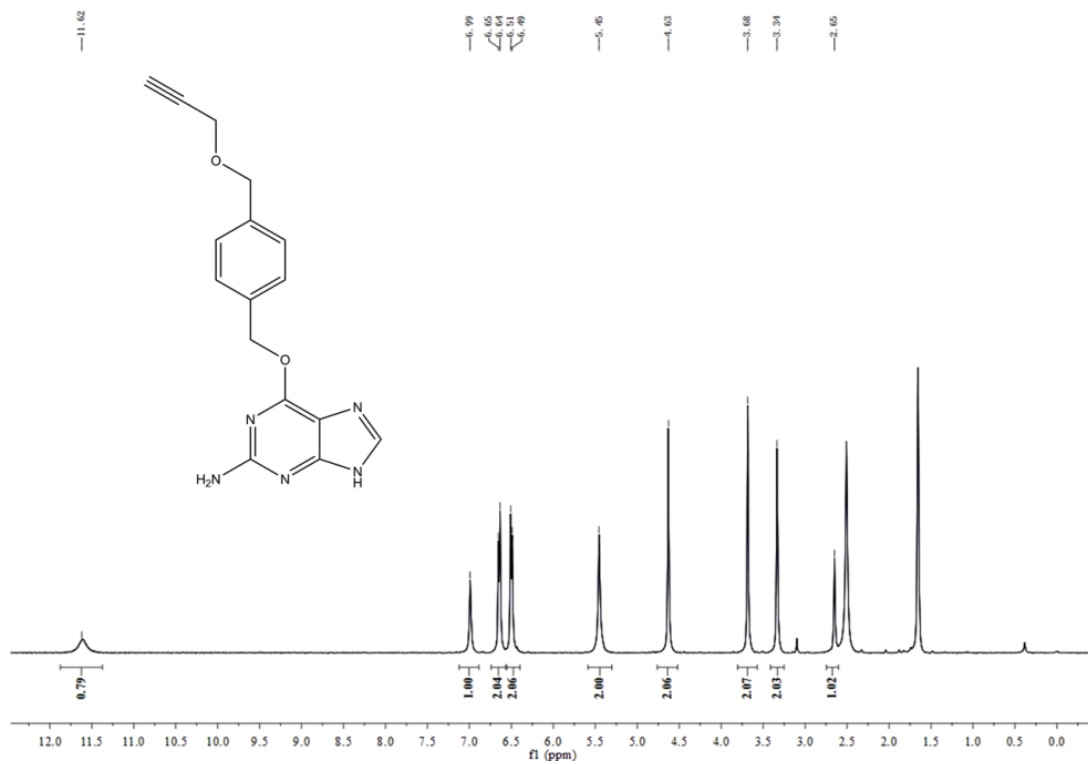

Figure 32. PYBG <sup>1</sup>H NMR

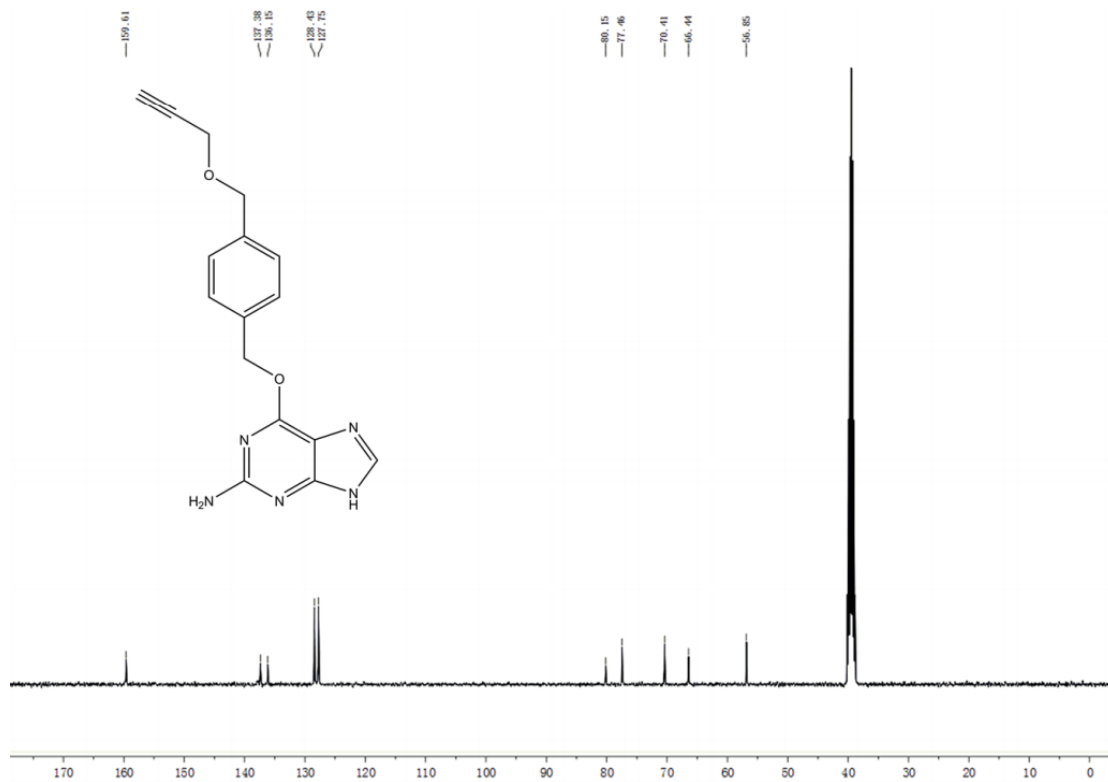

Figure 33. PYBG <sup>13</sup>C NMR

SXB-M732 #14-16 RT: 0.10-0.12 AV: 3 SB: 7 0.82-0.87 NL: 3.06E6  
T: FTMS + p ESI Full ms [200.00-1000.00]

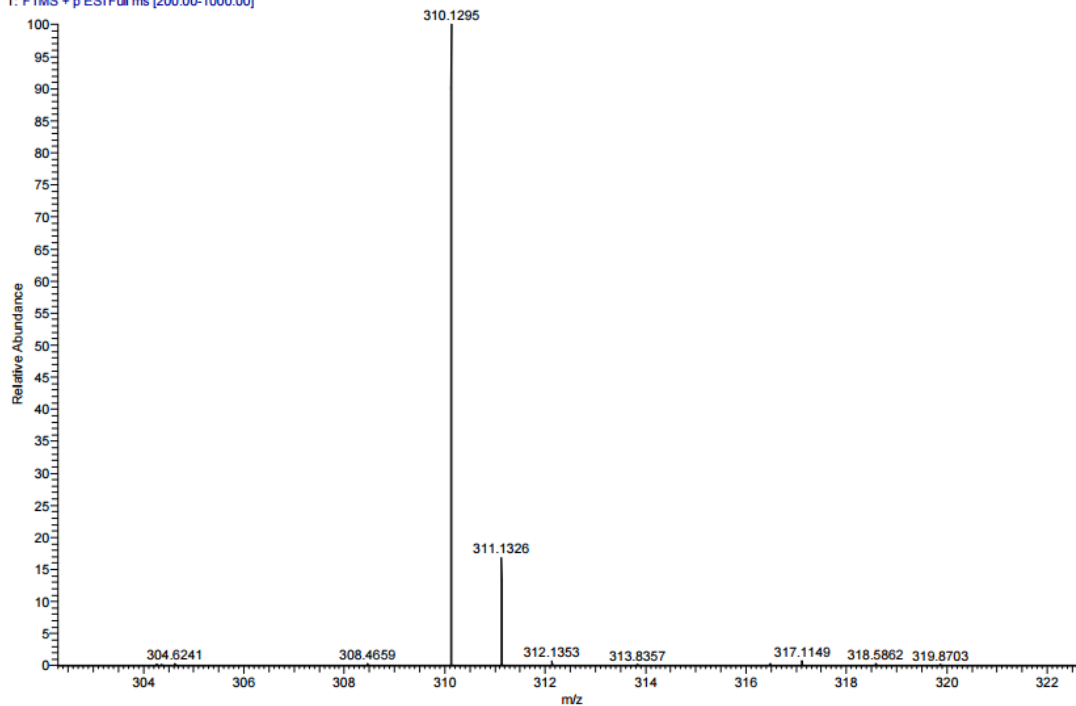

Figure 34.PYBG ESI MS spectrum
